# Supplementary material
Source: PubMed Central journal article supplement (PMC6059124)
Supplement: kwx054liwebmaterialfinal.pdf [file kwx054liwebmaterialfinal.pdf]

**Web Table 1.** Age- and Multivariate-Adjusted Hazard Ratios for Rosacea by Age at Smoking Initiation, Nurses' Health Study II, 1991–2005

| Smoking Status and Age<br>(Years) at Smoking Initiation | No. of<br>Cases | No. of<br>Person-Years | Crude<br>Incidence<br>Rate/100,000<br>Person-Years | Age-Adjusted |            | Multivariable-Adjusted <sup>a</sup> |           |
|---------------------------------------------------------|-----------------|------------------------|----------------------------------------------------|--------------|------------|-------------------------------------|-----------|
|                                                         |                 |                        |                                                    | HR           | 95% CI     | HR                                  | 95% CI    |
| Never smoker                                            | 3,586           | 851,853                | 421                                                | 1.00         | Referent   | 1.00                                | Referent  |
| Past smoker                                             |                 |                        |                                                    |              |            |                                     |           |
| ≤15                                                     | 239             | 43,146                 | 554                                                | 1.29         | 1.14, 1.48 | 1.24                                | 1.08,1.41 |
| 16–19                                                   | 876             | 170,111                | 515                                                | 1.18         | 1.09, 1.27 | 1.12                                | 1.04,1.21 |
| ≥20                                                     | 416             | 91,820                 | 453                                                | 1.02         | 0.92, 1.12 | 0.98                                | 0.88,1.08 |
| <i>P</i> <sub>trend</sub>                               |                 |                        |                                                    |              | 0.004      |                                     | 0.005     |
| Current smoker                                          |                 |                        |                                                    |              |            |                                     |           |
| ≤15                                                     | 49              | 18,883                 | 259                                                | 0.65         | 0.49, 0.87 | 0.64                                | 0.49,0.85 |
| 16–19                                                   | 193             | 67,871                 | 284                                                | 0.71         | 0.61, 0.82 | 0.69                                | 0.60,0.80 |
| ≥20                                                     | 103             | 43,791                 | 235                                                | 0.57         | 0.47, 0.70 | 0.57                                | 0.47,0.70 |
| <i>P</i> <sub>trend</sub>                               |                 |                        |                                                    |              | 0.83       |                                     | 0.81      |

Abbreviations: CI, confidence interval; HR, hazard ratio; MET, metabolic equivalent of task.

<sup>a</sup> Adjusted for age (years; continuous variable), race/ethnicity (% non-Hispanic white), body mass index (weight (kg)/height (m)<sup>2</sup>; continuous variable), postmenopausal hormone use (premenopausal, or never, current, or past use), alcohol drinking (none, or <4.9, 5.0–9.9, 10–14.9, 15–29.9, or ≥30.0 g/day), and physical activity (MET-hours/week, in quintiles)
